# Supplementary figures and images for: Pharmacological inhibition of autophagy by 3-MA attenuates hyperuricemic nephropathy
Source: PubMed Central journal article supplement — Clin Sci (Lond). 2018 Nov 2;132(21):2299–322. doi: 10.1042/CS20180563 (PMC6376616; doi:10.1042/cs20180563), 2018-11-02

# Supplemental Figure 1

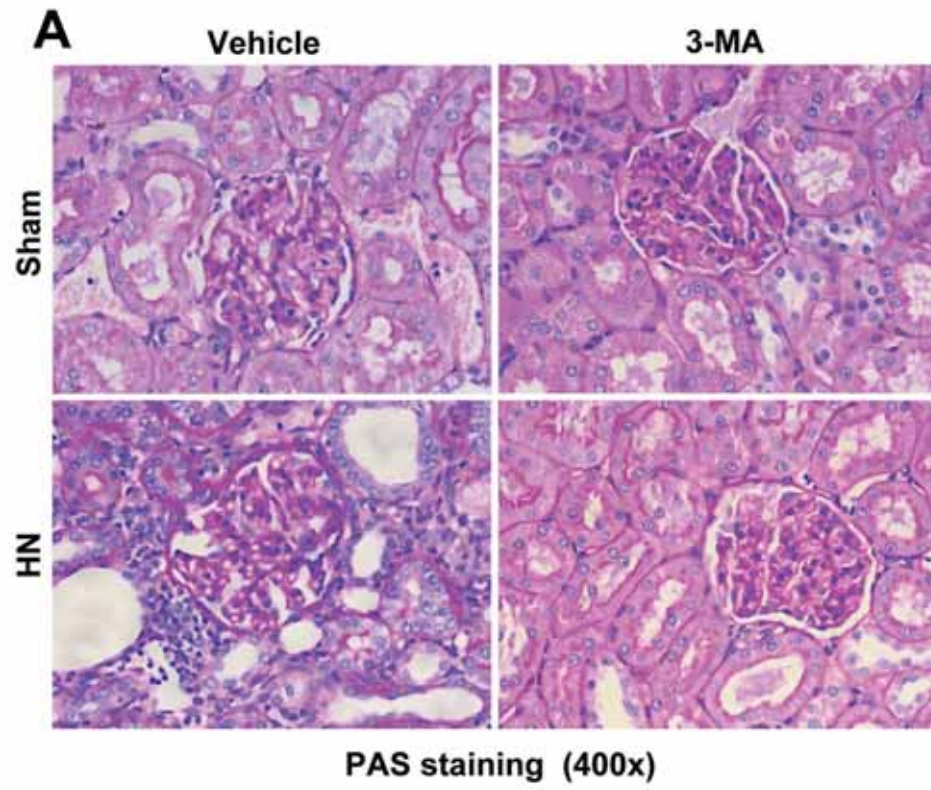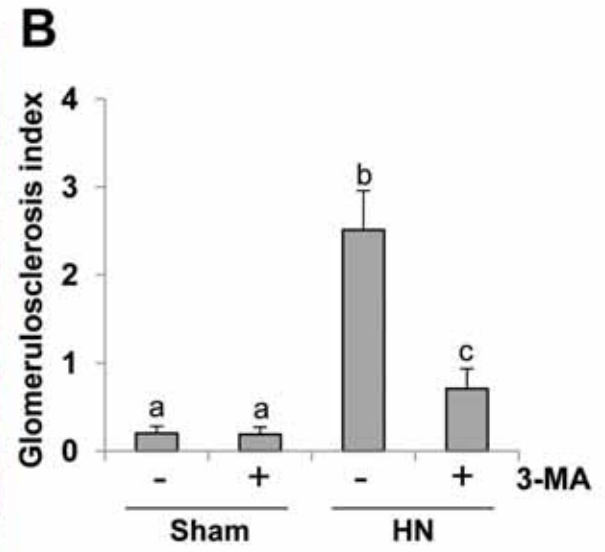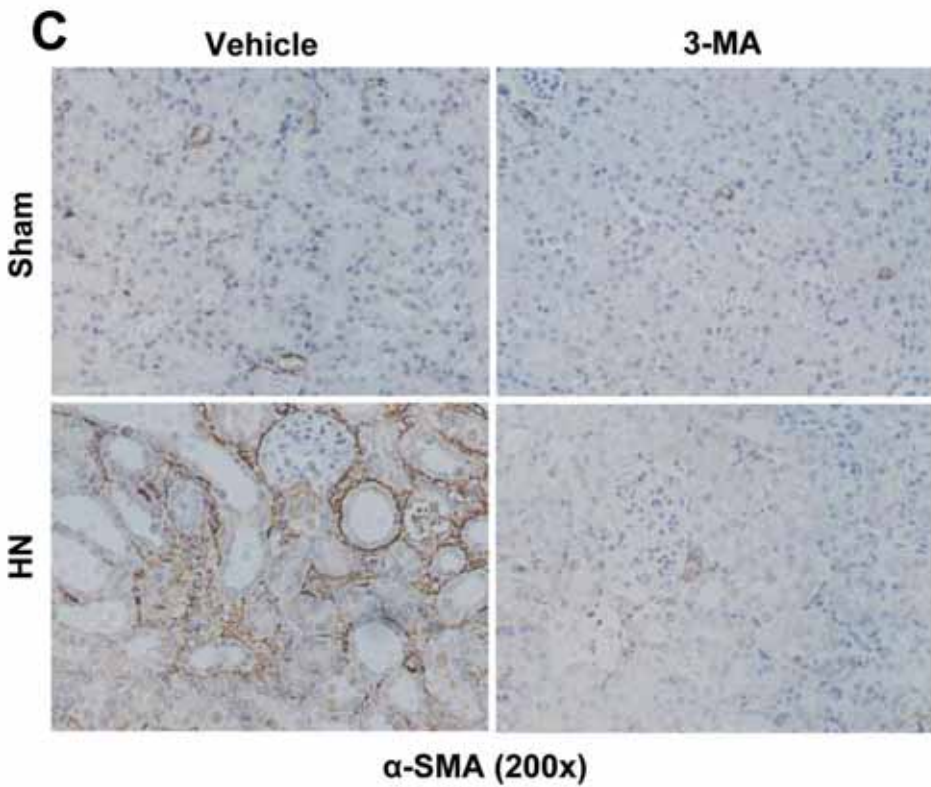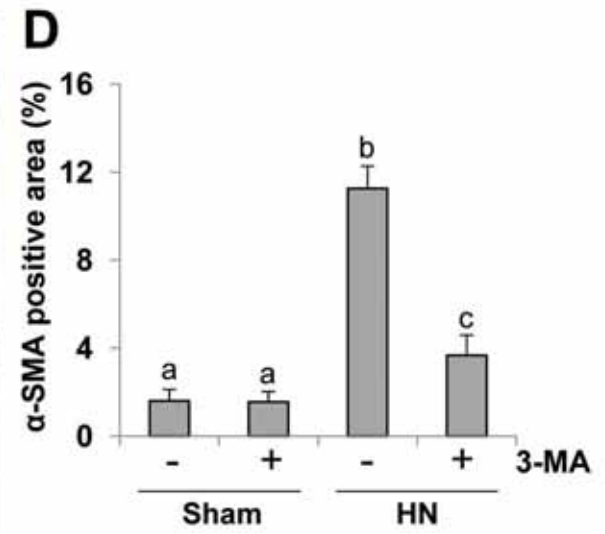

Supplement: cs-132-cs20180563_supp1.pdf [file cs-132-cs20180563_supp1.pdf]
